# Supplementary material for: Individual-level factors attributable to urban-rural disparity in mortality among older adults in China
Source: PubMed Central journal article supplement (PMC7526413; doi:10.1186/s12889-020-09574-9), 2020-09-29
Supplement: 12889_2020_9574_MOESM1_ESM.pdf [file 12889_2020_9574_MOESM1_ESM.pdf]

## Appendix

**Table A.** Adjusted Odds Ratios (OR) for Loss to Follow-up and Relative Hazard Ratios (HR) for Mortality with Imputation, CLHLS, 2002-2014

|                                                     | ORs for Loss to Follow-up | Relative HRs for Mortality <sup>a</sup> |           |           |           |           |           |           |
|-----------------------------------------------------|---------------------------|-----------------------------------------|-----------|-----------|-----------|-----------|-----------|-----------|
|                                                     |                           | Model I                                 | Model II  | Model III | Model IV  | Model V   | Model VI  | Model VII |
| Urban (rural)                                       | 1.81***                   | 0.91**                                  | 1.01      | 0.91**    | 0.93+     | 0.91**    | 0.94+     | 0.98      |
| <b>Demographic Background</b>                       |                           |                                         |           |           |           |           |           |           |
| Age                                                 | 0.99**                    | 1.11***                                 | 1.10***   | 1.10***   | 1.09***   | 1.08***   | 1.07***   | 1.06***   |
| Male                                                | 1.00                      | 1.35***                                 | 1.50***   | 1.43***   | 1.45***   | 1.56***   | 1.63***   | 1.67***   |
| Han (non-Han)                                       | 2.06***                   | 0.95                                    | 0.97      | 0.95      | 0.95      | 0.87+     | 0.88+     | 0.89+     |
| <b>Socioeconomic Factors</b>                        |                           |                                         |           |           |           |           |           |           |
| 1-6 years of schooling (0)                          | 0.98                      |                                         | 0.95      |           |           |           |           | 1.04      |
| 7+ years of schooling (0)                           | 1.095                     |                                         | 0.83**    |           |           |           |           | 0.94      |
| Economic independence (no)                          | 1.069                     |                                         | 0.71***   |           |           |           |           | 0.81***   |
| White collar occupation (no)                        | 1.05                      |                                         | 1.09+     |           |           |           |           | 1.04      |
| Good family economic condition (no)                 | 0.99                      |                                         | 0.93      |           |           |           |           | 1.03      |
| Adequate access to healthcare (no)                  | 1.08                      |                                         | 0.77***   |           |           |           |           | 0.91+     |
| <b>Family/Social Support</b>                        |                           |                                         |           |           |           |           |           |           |
| Currently married (no)                              | 0.80***                   |                                         |           | 0.78***   |           |           | 0.82**    | 0.84**    |
| Close proximity to children (no)                    | 0.66***                   |                                         |           | 1.07      |           |           | 1.04      | 1.02      |
| Primary support, child/relative (spouse)            | 0.95                      |                                         |           | 0.95      |           |           | 0.94      | 0.92      |
| Primary support, friend (spouse)                    | 0.92                      |                                         |           | 0.82**    |           |           | 0.87*     | 0.86*     |
| Primary support, other (spouse)                     | 1.17                      |                                         |           | 1.46**    |           |           | 1.13      | 1.12      |
| Primary support, nobody (spouse)                    | 0.86+                     |                                         |           | 1.59***   |           |           | 1.12      | 1.10      |
| <b>Health Behaviors</b>                             |                           |                                         |           |           |           |           |           |           |
| Leisure activity level, intermediate (low)          | 0.99                      |                                         |           |           | 0.46***   |           | 0.66***   | 0.67***   |
| Leisure activity level, high (low)                  | 1.02                      |                                         |           |           | 0.32***   |           | 0.53***   | 0.55***   |
| Currently smoking (no)                              | 0.90*                     |                                         |           |           | 0.91*     |           | 0.97      | 0.97      |
| Ever engaged in physical labor (no)                 | 0.74***                   |                                         |           |           | 0.99      |           | 1.02      | 0.98      |
| <b>Health Conditions</b>                            |                           |                                         |           |           |           |           |           |           |
| IADL disabled (no)                                  | 1.13**                    |                                         |           |           |           | 1.69***   | 1.55***   | 1.52***   |
| ADL disabled (no)                                   | 1.18***                   |                                         |           |           |           | 1.94***   | 1.65***   | 1.66***   |
| Cognitively impaired (no)                           | 0.92*                     |                                         |           |           |           | 1.56***   | 1.38***   | 1.37***   |
| Has 1+ chronic disease (no)                         | 0.99                      |                                         |           |           |           | 1.11**    | 1.12**    | 1.13***   |
| <b>Survey Interval</b>                              |                           |                                         |           |           |           |           |           |           |
| Waves 2005-2008 (2002-2005)                         | 1.79***                   | 0.88**                                  | 0.89**    | 0.86**    | 0.88**    | 0.90*     | 0.88**    | 0.89**    |
| Waves 2008-2011 (2002-2005)                         | 1.70***                   | 0.78***                                 | 0.80***   | 0.78***   | 0.78***   | 0.85***   | 0.82***   | 0.83***   |
| Wave 2011-2014 (2002-2005)                          | 1.81***                   | 0.70***                                 | 0.70***   | 0.69***   | 0.70***   | 0.70***   | 0.69***   | 0.69***   |
| df                                                  | 27                        | 7                                       | 13        | 13        | 11        | 11        | 21        | 27        |
| Wald $\chi^2$                                       | 1290.8***                 | 2454.0***                               | 2440.2*** | 2687.3*** | 3503.1*** | 3625.2*** | 3990.0*** | 3948.0*** |
| Wald $\chi^2$ for models vs. Model I <sup>b</sup>   | ---                       | ---                                     | 113.2***  | 137.7***  | 518.9***  | 723.5***  | 885.7***  | 937.6***  |
| Wald $\chi^2$ for Model VII vs. models <sup>c</sup> | ---                       | 937.6***                                | 786.1***  | 800.7***  | 527.5***  | 232.2***  | 23.74***  | ---       |

Note: (1) Reference group indicated in parentheses. (2) a, The relative hazard ratios for mortality were obtained from imputed data for those who were lost to follow-up. (3) b, Wald  $\chi^2$  tests for a given model to assess whether the inclusion of new variables significantly improved the goodness of fit compared to Model I; (4) c, Wald  $\chi^2$  tests for Model VII compared to each of the other models. (5) +p<0.1, \*p<0.05, \*\*p<0.01, \*\*\*p<0.001.
